# Supplementary material
Source: PubMed Central journal article supplement (PMC5622871)
Supplement: 2017.169334.GOLAY_SUPPL.pdf [file 2017.169334.GOLAY_SUPPL.pdf]

---

**The specific Bruton tyrosine kinase inhibitor acalabrutinib (ACP-196) shows favorable *in vitro* activity against chronic lymphocytic leukemia B cells with CD20 antibodies**

---

*Josée Golay, Greta Ubiali and Martino Introna*

*Center of Cellular Therapy "G. Lanzani, USC Hematology, and Fondazione per la Ricerca Ospedale Maggiore, ASST Papa Giovanni XXIII, Bergamo, Italy*

*Correspondence: [jgolay@asst-pg23.it](mailto:jgolay@asst-pg23.it)  
doi:10.3324/haematol.2017.169334*

## Supplementary Tables

Supplementary Table 1. Characteristics of CLL patients whose samples were used in apoptosis experiments

| Patient n° | Gender/age | Years from diagnosis | Binet stage | N° of previous treatment | Years from last treatment | WBC / $\mu$ l | %CD19 |
|------------|------------|----------------------|-------------|--------------------------|---------------------------|---------------|-------|
| 1          | F/59       | 6                    | B           | 1                        | 2                         | 153.1         | 97    |
| 2          | M/63       | 2                    | B           | 0                        | NA                        | 41.8          | 86    |
| 3          | F/50       | 16                   | A           | 2                        | 10                        | 38.5          | 71    |
| 4          | M/82       | 2                    | B           | 0                        | NA                        | 51.0          | 75    |

NA: Not applicable

Supplementary Table 2. Characteristics of the CLL patients whose samples were used for cytokine measurements

| Patient n° | Gender/age | Years from diagnosis | Binet stage | N° of previous treatment | Years from last treatment | WBC (x1000/ $\mu$ l) | %CD19 |
|------------|------------|----------------------|-------------|--------------------------|---------------------------|----------------------|-------|
| 5          | F/69       | 1                    | A           | 0                        | NA                        | 32.1                 | 89    |
| 6          | M/76       | 6                    | A           | 0                        | NA                        | 103.3                | 82    |
| 7          | M/70       | 2                    | B           | 0                        | NA                        | 53.8                 | 70    |
| 8          | F/76       | 4                    | A           | 0                        | NA                        | 66.3                 | 91    |
| 9          | M/76       | 9                    | C           | 0                        | NA                        | 55.0                 | 89    |
| 10         | M/70       | 11                   | A           | 1                        | 10                        | 11.4                 | 53    |

NA: Not applicable
